1 Structural analysis and construction of thermostable antifungal chitinase

2

3 Dan Kozome<sup>1,4</sup>, Keiko Uechi<sup>1</sup>, Toki Taira<sup>1</sup>, Harumi Fukada<sup>2</sup>, Tomomi Kubota<sup>3</sup>, Kazuhiko  
4 Ishikawa<sup>3\*</sup>

5

6 <sup>1</sup> Department of Bioscience and Biotechnology, University of the Ryukyus, 1 Senbaru,

7 Nishihara, Okinawa, 903-0213, Japan

8 <sup>2</sup> Graduate School of Science, Osaka Prefecture University, 1-1 Gakuencho, Sakai, Osaka

9 599-8531, Japan

10 <sup>3</sup> Biomedical Research Institute, National Institute of Advanced Industrial Science and

11 Technology (AIST), Central-6, 1-1 Higashi, Tsukuba, Ibaraki, 305-8566, Japan

12 <sup>4</sup> Okinawa Institute of Science and Technology Graduate University, Okinawa, 904-0412,

13 Japan (current affiliation)

14 Corresponding author: Kazuhiko Ishikawa

15 Email: kazu-ishikawa@aist.go.jp

16 **ABSTRACT**

17 Chitin is a biopolymer of *N*-acetyl-D-glucosamine with  $\beta$ -1,4-bond and is the main  
18 component of arthropod exoskeletons and the cell walls of many fungi. Chitinase (EC  
19 3.2.1.14) is an enzyme that hydrolyzes the  $\beta$ -1,4-bond in chitin and degrades chitin into  
20 oligomers. It has been found in a wide range of organisms. Chitinase from *Gazymaru*  
21 (*Ficus microcarpa*) latex exhibits antifungal activity by degrading chitin in the cell wall of  
22 fungi and is expected to be used in medical and agricultural fields. However, the enzyme's  
23 thermostability is an important factor; chitinase is not thermostable enough to maintain its  
24 activity under the actual applicable conditions. We solved the crystal structure of chitinase  
25 to explore the target sites to improve its thermostability. Based on the crystal structure and  
26 sequence alignment among other chitinases, we rationally introduced proline residues, a  
27 disulfide bond, and salt bridge in the chitinase using protein engineering methods. As a  
28 result, we successfully constructed the thermostable mutant chitinases rationally with high  
29 antifungal and specific activities. The results provide a useful strategy to enhance the  
30 thermostability of this enzyme family.

31

32 Keywords: protein engineering; proline; thermostable; disulfide bond; salt bride; chitin;  
33 antifungal activity; crystal structure

34

35 **IMPORTANCE**

36 We solved the crystal structure of the chitinase from *Gazymaru* (*Ficus microcarpa*) latex  
37 exhibiting antifungal activity. Furthermore, we demonstrated that the thermostable mutant  
38 enzyme with a melting temperature ( $T_m$ ) 6.9 °C higher than wild type (WT) and a half-life  
39 at 60°C that is 15 times longer than WT was constructed through 10 amino acid  
40 substitutions, including five proline residues substitutions, making disulfide bonding, and  
41 building a salt bridge network in the enzyme. These mutations do not affect its high  
42 antifungal activity and chitinase activity, and the principle for the construction of the  
43 thermostable chitinase was well explained by its crystal structure. Our results provide a  
44 useful strategy to enhance the thermostability of this enzyme family and to use the  
45 thermostable mutant as a seed for antifungal agents for practical use.

46

## 47 INTRODUCTION

48 It has been reported that nearly 80% of plant pathogens are fungi (1), and their damage to  
49 crops has become a significant problem in the agricultural industry. Up to now, chemical  
50 fungicides have been extensively adopted in combating current plant diseases. However,  
51 since fungi are eukaryotes like mammals, many chemical fungicides are highly toxic to  
52 human and fungi, and their utilization has been associated with risk. Therefore, the  
53 development of fungus-specific antifungal agents is in high demand. In a pathogenic attack,  
54 plants produce pathogenesis-related (PR) proteins as a part of systemic acquired resistance  
55 (2). Plant chitinase is considered to be one of these PR proteins. Chitinase, an enzyme that  
56 degrades chitin into oligomers, has been found to exist in a wide range of organisms. Since  
57 chitin is absent in animal cells compared to fungal cells, chitinases exhibiting the antifungal  
58 activity through the enzymatic hydrolysis of fungal cell walls (3) are expected to be used as  
59 a fungus-specific antifungal agent. According to the CAZy database  
60 (<http://www.cazy.org/>), chitinases (EC 3.2.1.14) are divided into two families, glycoside  
61 hydrolase (GH) family 18 (GH18) and 19 (GH19) based on amino acid sequences of their  
62 catalytic regions (4). Furthermore, according to an independent classification system for  
63 plant chitinases, they are grouped into at least five classes (classes I, II, III, IV, and V)  
64 based on their domain organization and loop deletions (5).

65         There are many reports of antifungal activity in plant GH19 chitinases; however,  
66 reports of antifungal activity in plant GH18 chitinases are minimal. Taira et al. have  
67 screened various tropical plants that produce latex for chitinase activity (6). Among them,  
68 latex from gazyumaru (*Ficus microcarpa*), a woody flowering plant distributed in  
69 subtropical/tropical regions in Asia, showed the highest catalytic activity of all samples  
70 assayed. Moreover, gazyumaru latex exhibits strong antifungal activity. Three types of  
71 chitinase were purified from gazyumaru latex; Gazyumaru latex chitinase-A, B, and -C  
72 (GlxCiA, B, and C) belong to class III, class I, and class III chitinase, respectively.  
73 Among them, GlxCiB, a basis class I chitinase (32 kDa, *pI* 9.3), exhibited the highest  
74 antifungal activity (6). GlxCiB consists of two domains, carbohydrate-binding module  
75 family 18 (CBM18) as a chitin-binding domain (ChBD) and GH19 domain as a catalytic

76 domain (7). The optimum temperature for GlxChiB was 50 – 60 °C, but this enzyme was  
77 unstable above 60 °C (6).

78 For industrial use of the enzyme, its high activity and thermostability are important  
79 factors. The thermostability of many enzymes has been improved by protein engineering  
80 methods for their industrial use. Random mutagenesis is a typical tool for increasing  
81 thermostability (8-10). Recently computational design can be applied to the protein design  
82 (11, 12). Compared with such trial-and-error methods, rational protein design using the  
83 protein model or structural data is developing as a powerful and efficient tool for constructing  
84 thermostable enzymes (13-15) . In this study, we solved the crystal structure of the catalytic  
85 domain of both WT and a thermostable mutant of GlxChiB, which was rationally designed  
86 by the protein engineering method not to affect the enzyme activity. Furthermore, based on  
87 the crystal structures of the WT and the thermostabilized enzyme, the mechanism of each  
88 mutation and new insight on the thermostabilizing effect are discussed.

89

## 90 **RESULTS**

### 91 **Structural aspect and crystal structure of the chitinase**

92 GlxChiB was found to belong to the GH19 family containing the chitin-binding domain  
93 (ChBD) at the N-terminus and exhibited high catalytic activity on chitin degradation and  
94 antifungal activities (7). Multiple sequence alignments of GH19 chitinases from the plant  
95 are shown in Figure 1. Only the truncated catalytic domain of WT GlxChiB (CD-WT;  
96 Amino acid numbers 45-289) was the object for the crystal structure determination in this  
97 study due to the low molecular weight ChBD (amino acid numbers 1-39) containing four  
98 disulfide bonds appearing to be a thermostable protein as observed in hevein, a small  
99 disulfide-rich protein from *Hevea brasiliensis* (16). The recombinant catalytic domain of  
100 the enzyme was prepared and purified as described previously (7). Crystals approximately  
101  $200 \times 200 \times 200 \mu\text{m}$  in size were obtained after more than one week at 298 K (see  
102 Materials and methods for the crystallization conditions). The diffraction data set was  
103 collected at a wavelength of 1.000 Å at the KEK PF BL5A. Data collection and refinement  
104 statistics are shown in Table 1. The diffraction data were collected up to 1.6 Å resolution.  
105 The crystals belonged to orthorhombic of space group P2(1)2(1)2(1), with unit cell  $a =$

106 90.900 Å,  $b = 106.583$  Å,  $c = 107.656$  Å. The initial phase of the structure was determined  
107 by molecular replacement with Phaser in the CCP4 package using the crystal structure of  
108 chitinase (GH19) from *Vigna unguiculata* (PDB: 4TX7) (17) as the search model. In the  
109 asymmetric unit, four molecules of CD-WT were identified; the Matthews coefficient (VM)  
110 (18) was calculated as  $2.32 \text{ \AA}^3 \text{ Da}^{-1}$ , with a solvent content of 47% (v/v). After refinement  
111 using Refmac5, R factors of the model were estimated as Rwork 22.7% and Rfree 25.3%.  
112 The value of Rfree was obtained from a test set consisting of 5% of all reflections.  
113 Ramachandran plot (19) for the model showed that 98% of the residues were in the most  
114 favored regions, with 2% of the residues in additional allowed regions. Trp121 is in  
115 Ramachandran outliers regions, with unambiguous electron density. The coordinates and  
116 structure factors for CD-WT were deposited in the Protein Data Bank under the accession  
117 code 7V91. The overall structures of four molecules of GlxChiB were built from 45 to 288  
118 residues (Figure 2A left), and the root means square deviation (RMSD) of the C $\alpha$  atoms  
119 was less than 0.457 Å over 300 C $\alpha$  atoms among them. The RMSD value indicated that the  
120 overall structures of the four molecules of GlxChiB were almost identical.

121

## 122 **Design of thermostable mutants of GlxChiB**

123 Sequence alignment among the chitinases; class-I chitinase from *Oryza sativa* (PDB ID:  
124 2DKV) (20), catalytic domain of class I chitinase from *Vigna unguiculata* (PDB ID:4TX7)  
125 (17), class II chitinase from *Secale cereale* (rye) seed (PDB ID:4DWX) (21), and class II  
126 chitinase from *Carica papaya* (PDB ID:3CQL) (22) are shown in Figure 1. In the catalytic  
127 domains of chitinase sequences, catalytic residues, disulfide bonds, and overall structures  
128 are well conserved. Proline is the only amino acid with a secondary amine, in that the side  
129 chain is directly connected to nitrogen of the main chain, preventing the rotation of phi  
130 angles of the peptide bond. Therefore, proline residues in proteins make the main chain at  
131 loop regions rigid, and several of them should be critical to the stability, including the  
132 thermostability of the protein. Furthermore, it has been proposed that the thermostability of  
133 a protein can be increased by introducing a proline that decreases the configurational  
134 entropy of unfolding (23). In the catalytic domains of GlxChiB sequence, some residues  
135 where proline residue is conserved in some other chitinases are replaced with other amino

136 acids (Figure 1). Therefore, the introduction of proline residues in CD-WT appears tolerant  
137 and responsible for increasing its thermostability. We first took notice of the proline  
138 residues for the construction of thermostable mutants. The five positions (Ala117, Ala151,  
139 Gln171, Ala233, and Ala254) in which proline residue are not conserved in CD-WT among  
140 these enzymes (Figure 1 and 3) are remarkable points for the mutations. Referring to the  
141 crystal structure of CD-WT, Ala117 is located at the second site of a beta-turn I (Figure  
142 4A), Ala151 is located at the second site of a beta-turn II (Figure 4B), Gln171 is located in  
143 in the middle of the helix structure (Figure 4C), and Ala233 and Ala254 are located at the  
144 loop region preceding conserved helix structure (Figure 4D and E). The following five  
145 substitutive mutations were employed in CD-WT: A117P, A151P, Q171P, A233P, and  
146 A254P.

147         A disulfide bridge linking the two cysteines and their respective main peptide  
148 chains can restrict the motion of the unfolded, random coil of protein or stabilize the folded  
149 state of the protein. One disulfide bridge can contribute 2.3–5.2 kcal/mol to the  
150 thermodynamic stability of proteins (24). Considerable evidence has demonstrated the  
151 thermostability effects of engineered disulfide bridges in protein. The crystal structural  
152 analysis clarified that CD-WT contains three disulfide bonds and free Cys residues. Using  
153 the program SSBOND (25) referring to the crystal structure of CD-WT, we cannot find the  
154 suitable position in which the additional disulfide bond can be introduced in CD-WT. We  
155 have no structural information of the linker region (amino acid numbers 40-44) between  
156 ChBD and CD-WT. However, from the crystal structure, it is estimated that the distance  
157 between C $\alpha$ s of N-terminal Asp45 and Lys83 is 6-8 Å in all CD-WT molecules, and then  
158 the distance between C $\alpha$ s of Gly44 (in the linker region) preceding Asp45 and Lys83 is  
159 considered to be similar. Therefore, the disulfide bond between Cys44 and Cys83 could  
160 form (Figure 3) and the mutant employed in G44C/K83C. In addition, it has been reported  
161 that salt bridges play an important role in the thermostability of many proteins. The  
162 ionizable side chains frequently form ion pairs in many protein structures. Since  
163 electrostatic attraction between opposite charges is strong *per se*, salt bridges can be  
164 regarded as an important factor stabilizing the protein structure. In addition, many salt  
165 bridges were observed at the surface of thermophilic enzymes (26-28). The loop region

166 250-255 located at the surface loop region between two helices appeared flexible. We  
167 targeted the loop region 250-255 located at the surface loop region between two helices in  
168 GlxChiB (Figure 3). Significant salt bridges were observed at the corresponding region in  
169 2DKV, 4TX7, 4DWX, and 3CQL but not in GlxChiB according to the multiple sequence  
170 alignment (Figure 1). Therefore, we tried to modify the three amino acids  
171 Q250/K253/Q255 to introduce salt bridges at the region in CD-WT by referring to these  
172 structures. Two mutants, Q250K/K253D/Q255R and Q250R/K253D/Q255R were  
173 prepared.

174

### 175 **Comparison of the thermostability of the mutants**

176 Recombinant GlxChiB and their mutants described above were prepared and purified by  
177 the same method previously reported (7). The enzymatic activity assays were performed as  
178 described in the material method. Their specific activities at 37 °C were not meaningfully  
179 affected by these mutations (Table 2). WT GlxChiB exhibited the maximum activity at the  
180 temperatures around 55 °C under the conditions employed at pH 7.0 for 15 minutes (Figure  
181 S1). The thermostability was examined by the residual activities of enzymes after the  
182 incubation at 60 °C. All proline substitution mutants showed a longer half-life than that of  
183 WT (Table 2). Furthermore, as for the melting temperature ( $T_m$ ) of the mutants measured  
184 by differential scanning calorimetry (DSC), all proline substitution mutants exhibited  
185 higher  $T_m$  values than that of WT (Table 2). For G44C/K83C,  $T_m$  did not change  
186 significantly; however, its half-life at 60 °C was elongated (Table 2). For the two mutants  
187 with a salt bridge network introduced (Q250K/K253D/Q255R and Q250R/K253D/Q255R),  
188 the specific activities at 37 °C were slightly increased, and the half-life at 60 °C was  
189 elongated (Table 2).

190

### 191 **The integrated Pro mutant and the crystal structure of the mutant**

192 For the thermostable proline substitute mutants (A117P, A151P, Q171P, A233P, and  
193 A254P), no decrease of the enzymatic or antifungal activity was observed (Table 2 and  
194 Figure 5). Table 2 shows that these substitutions did not affect both activities. All proline  
195 substitutions elongated half-life at 60 °C 1.4-2.4 times longer than WT, and the individual

196 effects on thermostability were considered cumulative. To examine the structural effects of  
197 proline substitutions on the enzyme's thermostability, we prepared the integrated mutant,  
198 mt5 (A117P/A151P/Q171P/A233P/A254P) and solved the crystal structure of the catalytic  
199 domain of mt5 (CD-mt5). CD-mt5 was prepared and purified as the same as for CD-WT.  
200 The crystals of CD-mt5 were grown under different conditions from those for CD-WT.  
201 Data collection and refinement statistics are shown in Table 1. The diffraction data was  
202 collected to a resolution of 1.80 Å. The crystals belonged to space group C2, with unit cell  
203  $a = 140.58 \text{ \AA}$ ,  $b = 38.89 \text{ \AA}$ ,  $c = 177.74 \text{ \AA}$ ,  $\beta = 96.03^\circ$ ; note this the crystal system is  
204 completely different from that of CD-WT. The coordinates and structure factors for CD-  
205 mt5 were deposited in the Protein Data Bank under the accession code 7V92. The overall  
206 structures of four molecules in an asymmetric unit were built from 45 to 288 (Figure 2A,  
207 right), and the RMSD of the C $\alpha$  atoms were less than 0.455 Å over 300C $\alpha$  atoms among  
208 them. The RMSD value indicated that the overall structures of the four molecules of CD-  
209 mt5 were almost identical. Furthermore, the RMSD of the C $\alpha$  atoms were less than 0.530 Å  
210 on average over 300C $\alpha$  atoms between CD-WT and CD-mt5 in chain A. This result shows  
211 that the overall structures and the active site between WT and mt5 were almost identical.  
212 Figure 2B and Figure 4 show the structural differences between CD-WT and CD-mt5 for  
213 the five mutation sites (A117P, A151P, Q171P, A233P, and A254P) and the active site  
214 residues, Glu111 and Glu133. The structures of the main chain and side chains around the  
215 mutation points were not influenced by these mutations. This result shows that all positions  
216 for the introduction of proline residue into WT are ideal for the construction of  
217 thermostable enzymes.

218 It was proved that the additional mutations for G44C/K83C and  
219 Q250K/K253D/Q255R into mt5 were also ideal for the construction of the thermostable  
220 enzymes by crystal structural analysis. Therefore, all positive mutations (mt5, G44C/K83C,  
221 Q250K/K253D/Q255R) were integrated and inspected. Table 2 shows that these mutations  
222 do not influence the specific activity and the individual effect for thermostability caused by  
223 mutations was additive. Half-life at 60 °C was elongated by accumulating mutations: half-  
224 life at 60 °C of mt5, mt5/G44C/K83C (mt5ss), and mt5ss/Q250K/K253D/Q255R were  
225 about 7, 11 and 15 times longer than that of WT, respectively (Table 2 and Figure 6A).



226 mt5ss/Q250K/K253D/Q255R was proved to be the best enzyme for this study (Table 2).  
227 For the 250th position, however, histidine residue was observed in other GH19 chitinases  
228 (2DKV and 4DWX) (Figure 1). In addition, the alternative mutant  
229 mt5ss/Q250H/K253D/Q255R was examined (Table 2). There was no significant difference  
230 in half-life at 60 °C of mt5ss/Q250H/K253D/Q255R and mt5ss/Q250K/K254D/Q255R, but  
231 half-life at 65 °C of mt5ss/Q250H/K253D/Q255R was about two times longer than that of  
232 mt5ss/Q250K/K254D/Q255R (Table 2 and Figure 6B). mt5ss/Q250H/K253D/Q255R  
233 showed the highest  $T_m$  (71.1 °C: 6.9 °C higher than that of WT) among the mutants and  
234 elongated its half-life at 60 °C 15 times and at 65 °C 90 times more than that of WT,  
235 respectively (Table 2).

236

### 237 **Comparison of the antifungal activity of the mutants**

238 The antifungal activities of GlxChiB and its mutants were determined by using the hyphal  
239 re-extension inhibition assay with *Trichoderma viride* as the test fungus (Figure 5). We  
240 define  $IC_{50}$  as the concentration where 50% of the hyphal re-extension areas are inhibited.  
241 As shown in Table 2 and Figure 5, the  $IC_{50}$  of WT is  $1.56 \pm 0.562 \mu\text{M}$ , and all mutants  
242 exhibit the same level of WT for their antifungal activities. It shows that all  
243 thermostabilized mutations do not affect their antifungal activities significantly.

244

## 245 **DISCUSSION**

### 246 **Obtaining thermostable mutants**

247 It is ideal for efficient antifungal activity to degrade chitin for actual use, which is  
248 realized by having the enzyme perform under various conditions. Thus, enzymes must be  
249 resistant to high temperature, organic solvents, not-neutral pH, and other chemicals.  
250 Thermostabilized chitinases are expected to exhibit excellent performance under such  
251 conditions. GlxChiB obtained from the gazyumaru latex has the highest antifungal activity  
252 among the other chitinases isolated from the latex and is expected to potentially be applied  
253 practically. While the optimum temperature for GlxChiB is 50 – 60 °C, this enzyme is  
254 unstable above 60 °C. Industrial use of this enzyme requires improving their  
255 thermostability without decreasing their enzymatic performance. However, there is often a

256 trade-off between thermostability and enzyme activity (29-31). In this study, we  
257 successfully obtained several thermostable mutants without decreasing their activities by  
258 rational design based on sequence and structural comparison among homologous enzymes.  
259 The thermostable GlxChiB created in this study is promising and has a high potential for its  
260 application. To date, two correlations about the primary sequences of an enzyme and its  
261 thermostability have been proved. One-point mutation can improve the thermostability of  
262 an enzyme, but this effect is in general minuscule (23, 32). The second is that such effects  
263 caused by individual structural changes from one-point mutations will be cumulatively  
264 counted and added (13-15, 33). These facts suggest that an enzyme is heat adaptable (34).  
265 Several studies (35-37) provided this trend about heat adaptation; however, a fundamental  
266 principle for the design of heat adaptable mutant enzymes has not been discovered (38).

267

### 268 **Structural interpretation of the thermostability by Proline substitution**

269 Proline is a unique amino acid residue in that the side chain is covalently bound to the  
270 preceding peptide bonded nitrogen and the five-membered ring imposes rigid constraints on  
271 the N-C $\alpha$  rotation (39). Thus, it is proposed that the substitution of proline for appropriate  
272 amino acids can increase the stability of a protein by decreasing the conformational entropy  
273 of unfolding (23, 37, 40), which is known as the “proline theory.” From the sequence  
274 homology among the four chitinases (Figure 1), we noticed the five residues where proline  
275 residue is conserved were in some other chitinases but not in GlxChiB, and we designed  
276 five mutants (A117P, A151P, Q171P, A233P, and A254P). All five mutants and integrated  
277 mutant, mt5, exhibited a positive effect on the thermostability (Table 2 and Figure 6).  
278 From the structural analysis (Figure 4), it was clarified that Ala117 is located at the second  
279 site of beta-turn I, Ala151 is located at the second site of beta-turn II, Gln171 is in the  
280 conserved helix structure, Ala233 and Ala254 are located at the loop region preceding  
281 conserved helix structure in CD of WT-GlxChiB, and Ala254 is located at N-terminal caps  
282 of  $\alpha$ -helices. Proline residues contributing to thermal stabilization favor second sites of  $\beta$ -  
283 turns, loop regions, and N-terminal caps of  $\alpha$ -helices (23, 36). Therefore, the construction  
284 of the thermostable mutants (A117P, A151P, A233P, and A254P) by the substitution of  
285 proline is well explained as the proline theory (36, 41).

286 Q171P is in a different circumstance; the residue is located in the middle of the  
287 alpha-helices structure, and proline residue is well known as the alpha-helices breaker (28).  
288 However, the Gly170 preceding the Pro171 appears to release the distorted structure by  
289 Pro171 (Figure 4C). In addition, Tyr147 and Trp200 exhibit the hydrophobic interaction  
290 toward Pro171 (Figure 7). The hydrophobic interaction appears to contribute to the  
291 thermostability of Q171P. For position 147, aromatic residues (Tyr, Phe, and Trp) are well  
292 conserved in the other chitinase, and Trp200 is also conserved in the enzyme (Figure 1). It  
293 is noteworthy that this hydrophobic interaction strengthens the connection between two  
294 helices and a loop region, contributing to the thermostability.

295

#### 296 **Structural interpretation of the thermostability by SS bond**

297 A disulfide bridge linking the two cysteines stabilizes the folded state of the protein. From  
298 the crystal structural data of CD-WT and the sequence homology among the enzymes, we  
299 cannot find the suitable position in which the additional disulfide bonding can be  
300 introduced in the catalytic domain. However, it was estimated that the disulfide bonding  
301 between Gly44 (in the linker region) and Lys83 could form. In the DSC analysis, the  
302 melting temperature ( $T_m$ ) of the mutant G44C/K83C was not higher than that of WT.  
303 However, the half-life at 60 °C was elongated without depressing their activities (Table 2  
304 and Figure 6). By introducing the disulfide bonding, the thermostability of the enzyme is  
305 not improved; however, irreversible inactivation appears to be suppressed.

306

#### 307 **Structural interpretation of the thermostability by Salt bridge**

308 It is well known that salt bridges contribute to the stability of proteins (42, 43). Ideally, the  
309 introduction of salt bridges can increase the thermostability of the enzyme. However, the  
310 fundamental problem is that the formation of salt bridges depends on the ionization  
311 properties of the participating groups, which are significantly influenced by the  
312 environmental changes around the proteins (44). Furthermore, salt bridges experience  
313 thermal fluctuations, continuously break and reform, and the flexibility of the protein  
314 governs their lifespan in solution. Nevertheless, proteins from thermophiles and  
315 hyperthermophiles exhibit more frequently networked salt bridges than proteins from the

316 mesophilic counterparts (43, 45, 46). Increasing the thermostability of proteins by  
317 optimizing charge-charge interactions is a good example of an evolutionary solution  
318 utilizing physical factors. For the two mutants with a salt bridge network introduced  
319 (Q250K/K253D/Q255R and Q250R/K253D/Q255R), specific activities at 37 °C were  
320 slightly increased. In addition, the half-life time at 60 °C was increased (Table2 and Figure  
321 6). Figure 7B shows a model structure of the loop region (250Q-255Q) between two helices  
322 in the catalytic domain of mt5ss/Q250K/K253D/Q255R based on the crystal structure of  
323 mt5. It is speculated that the salt bridge networks among Lys250, Asp253, and Arg255 are  
324 constructed by inferring the salt bridge network in other GH19 structures (Figure S2). It  
325 should be noted that this region involves the proline substitution site (A254P). Thus, the  
326 performance of mt5ss/Q250K/K253D/Q255R is achieved by multiple effects of the  
327 hydrophobic interaction between Trp252 and Pro254, the stabilized peptide chain by  
328 Pro254, and the salt bridge network among Lys250, Asp253, and Arg255. In addition,  
329 Asp253 in mt5ss/Q250K/K253D/Q255R appears to form ASX turn preceding  $\alpha$ -helices  
330 (Figure 1 and 7B) (47). The  $\alpha$ -helix has an overall dipole moment due to the aggregate  
331 effect of the individual microdipoles. Therefore,  $\alpha$ -helices often occur with the N-terminal  
332 end bound by a negatively charged group (48). It is speculated that Asp253 (negative  
333 charge) in mt5ss/Q250K/K253D/Q255R also increases the stability of the  $\alpha$ -helices in the  
334 enzyme. We cannot explain why the thermostability of mt5ss/Q250H/K253D/Q255R is  
335 better than mt5ss/Q250K/K253D/Q255R. However, this 250<sup>th</sup> histidine residue is  
336 conserved in some chitinases (Figure 1), and an additional mechanism of the  
337 thermostability seems to be involved. The detailed study for the position is in progress.

338

### 339 **Thermostable mutation effects on the catalytic and antifungal activity**

340 The trade-off between the stability and function of the enzyme is widely recognized from  
341 the observation that the substitution of catalytic residues can dramatically improve its  
342 stability at the expense of its activity (29-31). Improvement of thermostability without  
343 reducing enzyme activity is highly demanded in industrial applications. We targeted the  
344 mutation sites that are apart from the catalytic residues (Figure 3). As a result, all mutations  
345 applied to GlxChiB in this study did not reduce its catalytic activity and antifungal activity

346 (Table 2). Furthermore, some mutants exhibit higher antifungal activity than WT. It has  
347 been reported that decreasing the conformational entropy of unfolding contributes to a  
348 resistance to protease (49-51). Therefore, some thermostable mutations appear to affect the  
349 activity itself but improve the resistance to protease secreted from the fungus, resulting in  
350 the improvement of the antifungal activity. In summary, we have succeeded in making the  
351 enzyme thermostable without decreasing its high catalytic activity and antifungal activity  
352 by using protein engineering methods. This study provides a successful strategy to improve  
353 the thermostability of GH19 chitinase and identifies the thermostable mutants of GlxChiB  
354 as a good seed for industrial applications.

355

## 356 **MATERIALS AND METHODS**

### 357 **Construction of mutant protein genes**

358 The genes encoding GlxChiB and its mutants were cloned into pET22b (Novagen) at the  
359 NdeI and BamHI restriction sites. All mutant genes were constructed by polymerase chain  
360 reactions using a QuickChange Site-Directed Mutagenesis kit (Stratagene) and primers  
361 (Table S1). Confirmation of the plasmid DNA sequences was outsourced to Fasmac Japan  
362 (Kanagawa, Japan).

363

### 364 **Expression and purification of the recombinant protein**

365 Plasmids encoding GlxChiB and its mutants were transformed into *E.coli* SHuffle T7  
366 (DE3) cells (New England Biolabs). Cells harboring the plasmids were cultured at 37 °C in  
367 LB medium containing 100 mg/L ampicillin-Na for about 3.5 hours to reach OD600 of 0.6-  
368 0.8 and then were induced to express recombinant protein by adding IPTG to a final  
369 concentration of 0.1 mM. The culture was incubated for an additional 60 hours at 18 °C,  
370 and then the cells were harvested and disrupted by sonication in 20 mM Tris-HCl buffer,  
371 pH 8.0. The sonicated extract was separated into soluble and insoluble fractions by  
372 centrifugation at 12,000×g for 15 minutes at 4 °C. The soluble fraction was dialyzed against  
373 10 mM sodium phosphate buffer, pH 7.0, and apply to a RESOURCE S column (6 mL, GE  
374 Healthcare) previously equilibrated with the same buffer. The elution was done with a  
375 linear gradient of NaCl from 0 to 0.3 M in the same buffer. The fractions containing

376 recombinant protein were collected and dialyzed against 10 mM sodium phosphate buffer,  
377 pH 7.0. The purity of the recombinant protein was analyzed by SDS-PAGE by the Laemmli  
378 method (52) using 12.5% polyacrylamide gels.

379

#### 380 **Protein assay**

381 All protein concentrations were determined with the bicinchoninic acid (BCA) method  
382 (53). The protein concentration was determined with the Pierce BCA Protein Assay Kit  
383 (Thermo Scientific) using bovine serum albumin as the protein standard.

384

#### 385 **Chitinase activity assay**

386 Chitinase activity was assayed colorimetrically with glycol chitin as a substrate. Glycol  
387 chitin was prepared by the method described by Yamada & Imoto (54). Ten microliters of  
388 the sample solution were added to 250  $\mu$ L of 0.2% (w/v) glycol chitin solution in 0.1 M  
389 sodium phosphate buffer, pH 7.0. After incubation of the reaction mixture at 37 °C for 15  
390 minutes, the reducing power of the mixture was measured with ferric ferrocyanide reagent  
391 by the method of Imoto & Yagishita (55). One unit of activity was defined as the enzyme  
392 activity that produced 1  $\mu$ mol of GlcNAc per minute at 37 °C. The thermal stabilities of the  
393 enzymes were assessed by measuring the residual activities after incubation in 10 mM  
394 sodium phosphate buffer, pH 7.0 at 60 °C and 65 °C for the appropriate length of time. The  
395 residual activities were measured under the standard condition.

396

#### 397 **Quantitative antifungal activity assay (Taira et al., 2002) (56)**

398 Hyphal re-extension inhibition assay was done by using *Trichoderma viride*. Agar disks (4  
399 mm in diameter) containing the fungal hyphae, which were derived from the resting part of  
400 the fungus previously cultured on potato dextrose broth containing 1.5% (w/v) agar (PDA),  
401 were put on another PDA plate with the hyphae attached side down. Five microliters of  
402 sterile water or sample solution were overlaid on the agar disks, and then the plate was  
403 incubated at 25 °C. for 12 hours. After incubation, images of the plates were scanned using  
404 an image scanner. The areas of the re-extended hyphae were calculated as numbers of  
405 pixels by GNU Image Manipulation Program (GIMP, ver. 2.0). The protein concentration

406 required for inhibiting the growth of the fungus by 50% was defined as IC<sub>50</sub> and determined  
407 by constructing dose-response curves (percentage of growth inhibition versus protein  
408 concentration).

409

#### 410 **Differential scanning calorimetry (DSC)**

411 The thermal stability of the enzymes was examined using differential scanning calorimetry  
412 (DSC). GlxChiB or its mutants in 10 mM sodium phosphate buffer (pH 7.0) were used at a  
413 final concentration of 1.0 mg/mL. A Nano DSC instrument (TA Instruments) was used at a  
414 scanning speed of 60 °C/h. Control runs in the absence of protein were carried out before  
415 and after each sample run. DSC scans in the presence of protein were performed two or  
416 three times for each protein examined.

417

#### 418 **Crystallization**

419 The recombinant catalytic domain of the enzyme was prepared and purified as described  
420 previously (7). The purified proteins were dialyzed against 5 mM Tris-HCl buffer (pH 8.0)  
421 and concentrated to 10 mg/mL. Initial crystallization screening of the mutant protein was  
422 performed using various crystallization screening kits commercially available. The protein  
423 solution drop (0.15 µL) was mixed with 0.15 µL of a reservoir solution and then  
424 equilibrated with 50 µL of the reservoir solution. The crystallization was carried out  
425 according to the hanging-drop vapor diffusion method at 293 K in 96-well plates. After a  
426 week, well-formed crystals of CD-WT were obtained from the optimized condition (3%  
427 (w/v) gamma-polyglutamic acid low molecule, 25%(w/v) 2-Methy-2, 4-pentenediol, 0.1 M  
428 HEPES (pH 7.5), and 0.5 M Ammonium sulfate). Well-formed crystals of CD-mt5 were  
429 obtained from the different condition than CD-WT (18% (w/v) Polyethylene glycol 20K,  
430 0.1 M sodium citrate (pH 5.0), and 3% (v/v) glycerol).

431

#### 432 **X-ray data collection**

433 The crystal of CD-WT and CD-mt5 were frozen in liquid nitrogen. The diffraction data sets  
434 were collected at a wavelength of 1.000 Å at BL5A and NE3A beamline of the Photon

435 Factory in KEK, Japan, respectively. Data was processed by the program HKL2000 (57)  
436 for CD-WT and XDS (58) for CD-mt5.

437

#### 438 **Structure solution and refinement**

439 General data handling was carried out with the CCP4 package (59). The initial model was  
440 solved by molecular replacement using Phaser (60) with the crystal structure of chitinase  
441 (GH19) from *Vigna unguiculata* (PDB: 4TX7) (17) as the search model for CD-WT. The  
442 model building was carried out with *Coot* (61) and refinement using REFMAC5 (62).

443 Structural figures are described and rendered by the PyMOL Molecular Graphics System,  
444 Version 1.2r3pre, Schrödinger, LLC.

445

#### 446 **Acknowledgments**

447 This work was performed as a part of Projects of Okinawa innovation system building  
448 business of science and technology, supported by the Okinawa Science and Technology  
449 Promotion Center.

450

#### 451 **Author contributions**

452 DK, HF and TK performed the experiments. DK and KI wrote the manuscript. KI, TT, TK,  
453 and KU thoroughly revised the manuscript. KI and TT designed and supervised the project.  
454 All authors read and approved the manuscript.

455

#### 456 **References**

- 457 1. Oerke EC. 2005. Crop losses to pests. *The Journal of Agricultural Science*  
458 144:31-43.
- 459 2. van Loon LC, Pierpoint WS, Boller T, Conejero V. 1994. Recommendations  
460 for naming plant pathogenesis-related proteins. *Plant Molecular Biology*  
461 *Reporter* 12:245-264.
- 462 3. Schlumbaum A, Mauch F, Vögeli U, Boller T. 1986. Plant chitinases are  
463 potent inhibitors of fungal growth. *Nature* 324:365-367.



- 464 4. Henrissat B, Bairoch A. 1993. New families in the classification of glycosyl  
465 hydrolases based on amino acid sequence similarities. *Biochem J* 293 ( Pt  
466 3):781-8.
- 467 5. Taira T. 2010. Structures and antifungal activity of plant chitinases. *J*  
468 *Appl Glycosci* 57:167-176.
- 469 6. Taira T, Ohdomari A, Nakama N, Shimoji M, Ishihara M. 2005.  
470 Characterization and Antifungal Activity of Gazyumaru (*Ficus*  
471 *microcarpa*) Latex Chitinases: Both the Chitin-Binding and the  
472 Antifungal Activities of Class I Chitinase Are Reinforced with Increasing  
473 Ionic Strength. *Bioscience, Biotechnology, and Biochemistry* 69:811-818.
- 474 7. Takashima T, Henna H, Kozome D, Kitajima S, Uechi K, Taira T. 2021.  
475 cDNA cloning, expression, and antifungal activity of chitinase from *Ficus*  
476 *microcarpa* latex: difference in antifungal action of chitinase with and  
477 without chitin-binding domain. *Planta* 253:120.
- 478 8. Choi JG, Ju YH, Yeom SJ, Oh DK. 2011. Improvement in the  
479 thermostability of D-psicose 3-epimerase from *Agrobacterium*  
480 *tumefaciens* by random and site-directed mutagenesis. *Appl Environ*  
481 *Microbiol* 77:7316-20.
- 482 9. Kohno M, Enatsu M, Funatsu J, Yoshiizumi M, Kugimiya W. 2001.  
483 Improvement of the optimum temperature of lipase activity for *Rhizopus*  
484 *niveus* by random mutagenesis and its structural interpretation. *J*  
485 *Biotechnol* 87:203-10.
- 486 10. Zhang W, Jia M, Yu S, Zhang T, Zhou L, Jiang B, Mu W. 2016. Improving  
487 the Thermostability and Catalytic Efficiency of the d-Psicose 3-Epimerase  
488 from *Clostridium bolteae* ATCC BAA-613 Using Site-Directed  
489 Mutagenesis. *J Agric Food Chem* 64:3386-93.
- 490 11. Cui Y, Chen Y, Liu X, Dong S, Tian Ye, Qiao Y, Mitra R, Han J, Li C, Han  
491 X, Liu W, Chen Q, Wei W, Wang X, Du W, Tang S, Xiang H, Liu H, Liang  
492 Y, Houk KN, Wu B. 2021. Computational Redesign of a PETase for Plastic  
493 Biodegradation under Ambient Condition by the GRAPE Strategy. *ACS*

- 494 Catalysis 11:1340-1350.
- 495 12. Musil M, Stourac J, Bendl J, Brezovsky J, Prokop Z, Zendulka J, Martinek  
496 T, Bednar D, Damborsky J. 2017. FireProt: web server for automated  
497 design of thermostable proteins. *Nucleic Acids Res* 45:W393-w399.
- 498 13. Watanabe M, Fukada H, Ishikawa K. 2016. Construction of Thermophilic  
499 Xylanase and Its Structural Analysis. *Biochemistry* 55:4399-409.
- 500 14. Nakabayashi M, Kamachi S, Malle D, Yanamoto T, Kishishita S, Fujii T,  
501 Inoue H, Ishikawa K. 2019. Construction of thermostable  
502 cellobiohydrolase I from the fungus *Talaromyces cellulolyticus* by protein  
503 engineering. *Protein Eng Des Sel* 32:33-40.
- 504 15. Ishikawa K, Kataoka M, Yanamoto T, Nakabayashi M, Watanabe M,  
505 Ishihara S, Yamaguchi S. 2015. Crystal structure of  $\beta$ -galactosidase from  
506 *Bacillus circulans* ATCC 31382 (BgaD) and the construction of the  
507 thermophilic mutants. *Febs j* 282:2540-52.
- 508 16. Hernández-Arana A, Rojo-Domínguez A, Soriano-García M, Rodríguez-  
509 Romero A. 1995. The thermal unfolding of hevein, a small disulfide-rich  
510 protein. *Eur J Biochem* 228:649-52.
- 511 17. Landim PGC, Correia TO, Silva FDA, Nepomuceno DR, Costa HPS,  
512 Pereira HM, Lobo MDP, Moreno FBMB, Brandão-Neto J, Medeiros SC,  
513 Vasconcelos IM, Oliveira JTA, Sousa BL, Barroso-Neto IL, Freire VN,  
514 Carvalho CPS, Monteiro-Moreira ACO, Grangeiro TB. 2017. Production  
515 in *Pichia pastoris*, antifungal activity and crystal structure of a class I  
516 chitinase from cowpea (*Vigna unguiculata*): Insights into sugar binding  
517 mode and hydrolytic action. *Biochimie* 135:89-103.
- 518 18. Matthews BW. 1968. Solvent content of protein crystals. *Journal of*  
519 *Molecular Biology* 33:491-497.
- 520 19. Ramachandran GN, Sasisekharan V. 1968. Conformation of polypeptides  
521 and proteins. *Adv Protein Chem* 23:283-438.
- 522 20. Kezuka Y, Kojima M, Mizuno R, Suzuki K, Watanabe T, Nonaka T. 2010.  
523 Structure of full-length class I chitinase from rice revealed by X-ray

- 524 crystallography and small-angle X-ray scattering. *Proteins* 78:2295-305.
- 525 21. Ohnuma T, Numata T, Osawa T, Inanaga H, Okazaki Y, Shinya S, Kondo  
526 K, Fukuda T, Fukamizo T. 2012. Crystal structure and chitin  
527 oligosaccharide-binding mode of a 'loopful' family GH19 chitinase from rye,  
528 *Secale cereale*, seeds. *Febs j* 279:3639-3651.
- 529 22. Huet J, Rucktooa P, Clantin B, Azarkan M, Looze Y, Villeret V, Wintjens  
530 R. 2008. X-ray structure of papaya chitinase reveals the substrate binding  
531 mode of glycosyl hydrolase family 19 chitinases. *Biochemistry* 47:8283-91.
- 532 23. Matthews BW, Nicholson H, Becktel WJ. 1987. Enhanced protein  
533 thermostability from site-directed mutations that decrease the entropy of  
534 unfolding. *Proceedings of the National Academy of Sciences* 84:6663-6667.
- 535 24. Tidor B, Karplus M. 1993. The contribution of cross-links to protein  
536 stability: A normal mode analysis of the configurational entropy of the  
537 native state. *Proteins: Structure, Function, and Bioinformatics* 15:71-79.
- 538 25. Hazes B, Dijkstra BW. 1988. Model building of disulfide bonds in proteins  
539 with known three-dimensional structure. *Protein Engineering, Design*  
540 *and Selection* 2:119-125.
- 541 26. Arnott MA, Michael RA, Thompson CR, Hough DW, Danson MJ. 2000.  
542 Thermostability and thermoactivity of citrate synthases from the  
543 thermophilic and hyperthermophilic archaea, *Thermoplasma*  
544 *acidophilum* and *Pyrococcus furiosus*. *J Mol Biol* 304:657-68.
- 545 27. Christodoulou E, Rypniewski WR, Vorgias CR. 2003. High-resolution X-  
546 ray structure of the DNA-binding protein HU from the hyper-thermophilic  
547 *Thermotoga maritima* and the determinants of its thermostability.  
548 *Extremophiles* 7:111-22.
- 549 28. Tanaka T, Sawano M, Ogasahara K, Sakaguchi Y, Bagautdinov B, Katoh  
550 E, Kuroishi C, Shinkai A, Yokoyama S, Yutani K. 2006. Hyper-  
551 thermostability of CutA1 protein, with a denaturation temperature of  
552 nearly 150 degrees C. *FEBS Lett* 580:4224-30.
- 553 29. Beadle BM, Shoichet BK. 2002. Structural Bases of Stability–function

- 554 Tradeoffs in Enzymes. *Journal of Molecular Biology* 321:285-296.
- 555 30. Meiering EM, Serrano L, Fersht AR. 1992. Effect of active site residues in  
556 barnase on activity and stability. *Journal of Molecular Biology* 225:585-  
557 589.
- 558 31. Shoichet BK, Baase WA, Kuroki R, Matthews BW. 1995. A relationship  
559 between protein stability and protein function. *Proceedings of the*  
560 *National Academy of Sciences* 92:452-456.
- 561 32. Alber T. 1989. Mutational effects on protein stability. *Annual review of*  
562 *biochemistry* 58:765-798.
- 563 33. Wells JA. 1990. Additivity of mutational effects in proteins. *Biochemistry*  
564 29:8509-8517.
- 565 34. Argos P, Rossman MG, Grau UM, Zuber H, Frank G, Tratschin JD. 1979.  
566 Thermal stability and protein structure. *Biochemistry* 18:5698-703.
- 567 35. Matthews BW. 1987. Genetic and structural analysis of the protein  
568 stability problem. *Biochemistry* 26:6885-6888.
- 569 36. Suzuki Y, Oishi K, Nakano H, Nagayama T. 1987. A strong correlation  
570 between the increase in number of proline residues and the rise in  
571 thermostability of five *Bacillus oligo-1,6-glucosidases*. *Applied*  
572 *Microbiology and Biotechnology* 26:546-551.
- 573 37. Watanabe K, Masuda T, Ohashi H, Mihara H, Suzuki Y. 1994. Multiple  
574 proline substitutions cumulatively thermostabilize *Bacillus cereus*  
575 ATCC7064 oligo-1,6-glucosidase. Irrefragable proof supporting the proline  
576 rule. *Eur J Biochem* 226:277-83.
- 577 38. Jaenicke R, Závodszy P. 1990. Proteins under extreme physical  
578 conditions. *FEBS Letters* 268:344-349.
- 579 39. MacArthur MW, Thornton JM. 1991. Influence of proline residues on  
580 protein conformation. *J Mol Biol* 218:397-412.
- 581 40. Schimmel PR, Flory PJ. 1968. Conformational energies and  
582 configurational statistics of copolypeptides containing l-proline. *Journal*  
583 *of Molecular Biology* 34:105-120.

- 584 41. Chou PY, Fasman GD. 1974. Prediction of protein conformation.  
585 Biochemistry 13:222-245.
- 586 42. Kumar S, Nussinov R. 1999. Salt bridge stability in monomeric proteins.  
587 Journal of molecular biology 293:1241-1255.
- 588 43. Xiao L, Honig B. 1999. Electrostatic contributions to the stability of  
589 hyperthermophilic proteins. Journal of molecular biology 289:1435-1444.
- 590 44. Kumar S, Nussinov R. 2002. Relationship between ion pair geometries  
591 and electrostatic strengths in proteins. Biophysical journal 83:1595-1612.
- 592 45. Dominy BN, Minoux H, Brooks III CL. 2004. An electrostatic basis for the  
593 stability of thermophilic proteins. Proteins: Structure, Function, and  
594 Bioinformatics 57:128-141.
- 595 46. Zhou H-X, Dong F. 2003. Electrostatic contributions to the stability of a  
596 thermophilic cold shock protein. Biophysical journal 84:2216-2222.
- 597 47. Richardson JS. 1981. The anatomy and taxonomy of protein structure.  
598 Adv Protein Chem 34:167-339.
- 599 48. Motoshima H, Mine S, Masumoto K, Abe Y, Iwashita H, Hashimoto Y,  
600 Chijiiwa Y, Ueda T, Imoto T. 1997. Analysis of the stabilization of hen  
601 lysozyme by helix macrodipole and charged side chain interaction. J  
602 Biochem 121:1076-81.
- 603 49. Fontana A, Polverino de Laureto P, De Filippis V, Scaramella E, Zambonin  
604 M. 1997. Probing the partly folded states of proteins by limited proteolysis.  
605 Fold Des 2:R17-26.
- 606 50. Whitlow M, Bell BA, Feng SL, Filpula D, Hardman KD, Hubert SL,  
607 Rollence ML, Wood JF, Schott ME, Milenic DE, et al. 1993. An improved  
608 linker for single-chain Fv with reduced aggregation and enhanced  
609 proteolytic stability. Protein Eng 6:989-95.
- 610 51. Parsell DA, Sauer RT. 1989. The structural stability of a protein is an  
611 important determinant of its proteolytic susceptibility in *Escherichia coli*.  
612 J Biol Chem 264:7590-5.
- 613 52. Laemmli UK. 1970. Cleavage of Structural Proteins during the Assembly

- 614 of the Head of Bacteriophage T4. *Nature* 227:680-685.
- 615 53. Smith PK, Krohn RI, Hermanson GT, Mallia AK, Gartner FH, Provenzano  
616 MD, Fujimoto EK, Goeke NM, Olson BJ, Klenk DC. 1985. Measurement  
617 of protein using bicinchoninic acid. *Anal Biochem* 150:76-85.
- 618 54. Yamada H, Imoto T. 1981. A convenient synthesis of glycolchitin, a  
619 substrate of lysozyme. *Carbohydr Res* 92:160-2.
- 620 55. Imoto T, Yagishita K. 1971. A Simple Activity Measurement of Lysozyme.  
621 *Agricultural and Biological Chemistry* 35:1154-1156.
- 622 56. Taira T, Ohnuma T, Yamagami T, Aso Y, Ishiguro M, Ishihara M. 2002.  
623 Antifungal Activity of Rye (*Secale cereale*) Seed Chitinases: the Different  
624 Binding Manner of Class I and Class II Chitinases to the Fungal Cell  
625 Walls. *Bioscience, Biotechnology, and Biochemistry* 66:970-977.
- 626 57. Otwinowski Z, Minor W. 1997. Processing of X-ray diffraction data  
627 collected in oscillation mode. *Methods Enzymol* 276:307-326.
- 628 58. Kabsch W. 2010. XDS. *Acta crystallographica Section D, Biological*  
629 *crystallography* 66:125-132.
- 630 59. Potterton E, Briggs P, Turkenburg M, Dodson E. 2003. A graphical user  
631 interface to the CCP4 program suite. *Acta Crystallogr D Biol Crystallogr*  
632 59:1131-7.
- 633 60. McCoy AJ, Grosse-Kunstleve RW, Adams PD, Winn MD, Storoni LC, Read  
634 RJ. 2007. Phaser crystallographic software. *J Appl Crystallogr* 40:658-674.
- 635 61. Emsley P, Cowtan K. 2004. Coot: model-building tools for molecular  
636 graphics. *Acta Crystallogr D Biol Crystallogr* 60:2126-32.
- 637 62. Murshudov GN, Skubák P, Lebedev AA, Pannu NS, Steiner RA, Nicholls  
638 RA, Winn MD, Long F, Vagin AA. 2011. REFMAC5 for the refinement of  
639 macromolecular crystal structures. *Acta Crystallogr D Biol Crystallogr*  
640 67:355-67.

641

## 642 **Tables**

### 643 **Table 1. Data Collection and Refinement Statistics for CD-WT and CD-mt5**

|                                           | CD-WT                                  | CD-mt5                                                 |
|-------------------------------------------|----------------------------------------|--------------------------------------------------------|
| <b>PDB Entry</b>                          | 7V91                                   | 7V92                                                   |
| <b>Data collection</b>                    |                                        |                                                        |
| Wavelength (Å)                            | 1.0000                                 | 1.0000                                                 |
| Resolution (Å)                            | 50.00 – 1.60 (1.63-1.60)               | 47.58-1.8 (1.70-1.60)                                  |
| Space group                               | $P2_12_12_1$                           | $C2$                                                   |
| Unit cell dimensions (Å/°)                | $a = 90.9, b = 106.58$<br>$c = 107.66$ | $a = 140.58, b = 38.89$<br>$c = 177.74, \beta = 96.03$ |
| No. of total reflections                  | 1,000,279                              | 799,385                                                |
| No. of unique reflections                 | 137,756                                | 235,922                                                |
| Rmerge*(%)                                | 6.1 (38.1)                             | 5.0 (39.9)                                             |
| Completeness (%)                          | 99.8 (99.7)                            | 96.6 (88.5)                                            |
| Redundancy                                | 7.3 (3.8)                              | 3.4 (3.16)                                             |
| Average I/σ (I)                           | 46.0 (5.6)                             | 12.0 (2.3)                                             |
| molecules/ASU                             | 4                                      | 4                                                      |
| Matthews coefficient (Å <sup>3</sup> /Da) | 2.5                                    | 2.32                                                   |
| Solvent (%)                               | 51                                     | 47                                                     |
| <b>Refinement</b>                         |                                        |                                                        |
| Rwork**/Rfree*** (%)                      | 22.7/25.3                              | 21.3/24.3                                              |
| RMS deviations from ideal values          |                                        |                                                        |
| Bond angle (°)                            | 1.400                                  | 1.365                                                  |
| Bond length (Å)                           | 0.006                                  | 0.006                                                  |
| Ramachandran plot                         |                                        |                                                        |
| Favored (%)                               | 98                                     | 97                                                     |
| Allowed (%)                               | 2                                      | 2                                                      |
| Outliers (%)                              | 0 (4 residues)                         | 0 (2 residues)                                         |

644

645 The numbers in parentheses are for the outer shells.

646  $*R_{\text{merge}} = \frac{\sum_{hkl} \sum_j |I_{j(hkl)} - \langle I_{(hkl)} \rangle|}{\sum_{hkl} \sum_j I_{j(hkl)}}$ , where  $I_{j(hkl)}$  is the  $j$ th measurement of reflection  
647  $hkl$ , including symmetry-related observations of a unique reflection, and  $\langle I_{(hkl)} \rangle$  is the  
648 average.

649  $**R_{\text{work}} = \frac{\sum |F_o - F_c|}{\sum F_o}$  calculated for the working set.

650  $**R_{\text{free}} = \frac{\sum |F_o - F_c|}{\sum F_o}$  calculated for the test set (approximately 5% of reflections that  
651 were excluded from the refinement).

652

653 **Table 2. Summary of the enzymatic activities and thermodynamic parameters of the**  
654 **GlxChiB and its mutants.**

|                   |                         | DSC*               |         | Specific activity**<br>(U/mol) | Antifungal activity<br>( $\mu$ M) | Half-life (min)  |                 |
|-------------------|-------------------------|--------------------|---------|--------------------------------|-----------------------------------|------------------|-----------------|
|                   |                         | Tm ( $^{\circ}$ C) |         |                                |                                   | 60 $^{\circ}$ C  | 65 $^{\circ}$ C |
| WT                |                         | 64.2               |         | $5.40 \times 10^9$             | $1.56 \pm 0.562$                  | $6.9 \pm 0.51$   | $0.7 \pm 0.08$  |
| G44C/K83C         | Disulfide bonding       | 64.2               | (+ 0)   | $6.06 \times 10^9$             | $1.58 \pm 0.200$                  | $14.5 \pm 0.54$  | -               |
| A117P             | Pro substitution        | 65.7               | (+ 1.5) | $4.40 \times 10^9$             | $1.54 \pm 0.310$                  | $13.8 \pm 0.32$  | -               |
| A151P             | Pro substitution        | 64.8               | (+ 0.6) | $4.64 \times 10^9$             | $1.36 \pm 0.064$                  | $9.9 \pm 0.54$   | -               |
| Q171P             | Pro substitution        | 65.3               | (+ 1.1) | $5.40 \times 10^9$             | $1.32 \pm 0.018$                  | $15.1 \pm 0.59$  | -               |
| A233P             | Pro substitution        | 66.8               | (+ 2.6) | $5.56 \times 10^9$             | $1.40 \pm 0.110$                  | $17.0 \pm 0.46$  | -               |
| A254P             | Pro substitution        | 64.5               | (+ 0.3) | $4.59 \times 10^9$             | $1.49 \pm 0.027$                  | $14.7 \pm 0.89$  | -               |
| Q250K/K253D/Q255R | Salt bridge             | 65.6               | (+ 1.4) | $7.38 \times 10^9$             | $1.21 \pm 0.024$                  | $13.7 \pm 1.20$  | -               |
| Q250R/K253D/Q255R | Salt bridge             | 65.8               | (+ 1.6) | $7.50 \times 10^9$             | $1.06 \pm 0.094$                  | $10.8 \pm 0.19$  | -               |
| mt5               | All five Pro mutation   | 67.2               | (+ 3.0) | $4.74 \times 10^9$             | $0.69 \pm 0.130$                  | $47.4 \pm 1.39$  | $3.3 \pm 0.18$  |
| mt5ss             | mt5/G44C/K83C           | 67                 | (+ 2.8) | $5.88 \times 10^9$             | $0.69 \pm 0.050$                  | $73.8 \pm 2.49$  | $3.9 \pm 0.32$  |
| mt5ss/KDR         | mt5ss/Q250K/K253D/Q255R | 69.1               | (+ 4.9) | $4.31 \times 10^9$             | $1.58 \pm 0.200$                  | $104.7 \pm 7.21$ | $33.2 \pm 2.85$ |
| mt5ss/HDR         | mt5ss/Q250H/K253D/Q255R | 71.1               | (+ 6.9) | $5.13 \times 10^9$             | $1.94 \pm 0.180$                  | $103.9 \pm 3.34$ | $63.3 \pm 0.97$ |

655

656 \*Melting temperature (Tm) was measured using DSC followed by the procedures described  
657 as in the materials and methods.

658 \*\*Specific activity was measured in the standard condition using 0.2% (w/v) glycol chitin  
659 as substrate; 37  $^{\circ}$ C for 15 minutes in 0.2 M sodium phosphate buffer (pH 7.0). One unit of  
660 activity was defined as the enzyme activity that produced 1  $\mu$ mol of GlcNAc per minute at  
661 37  $^{\circ}$ C.

662

663 **Figures**



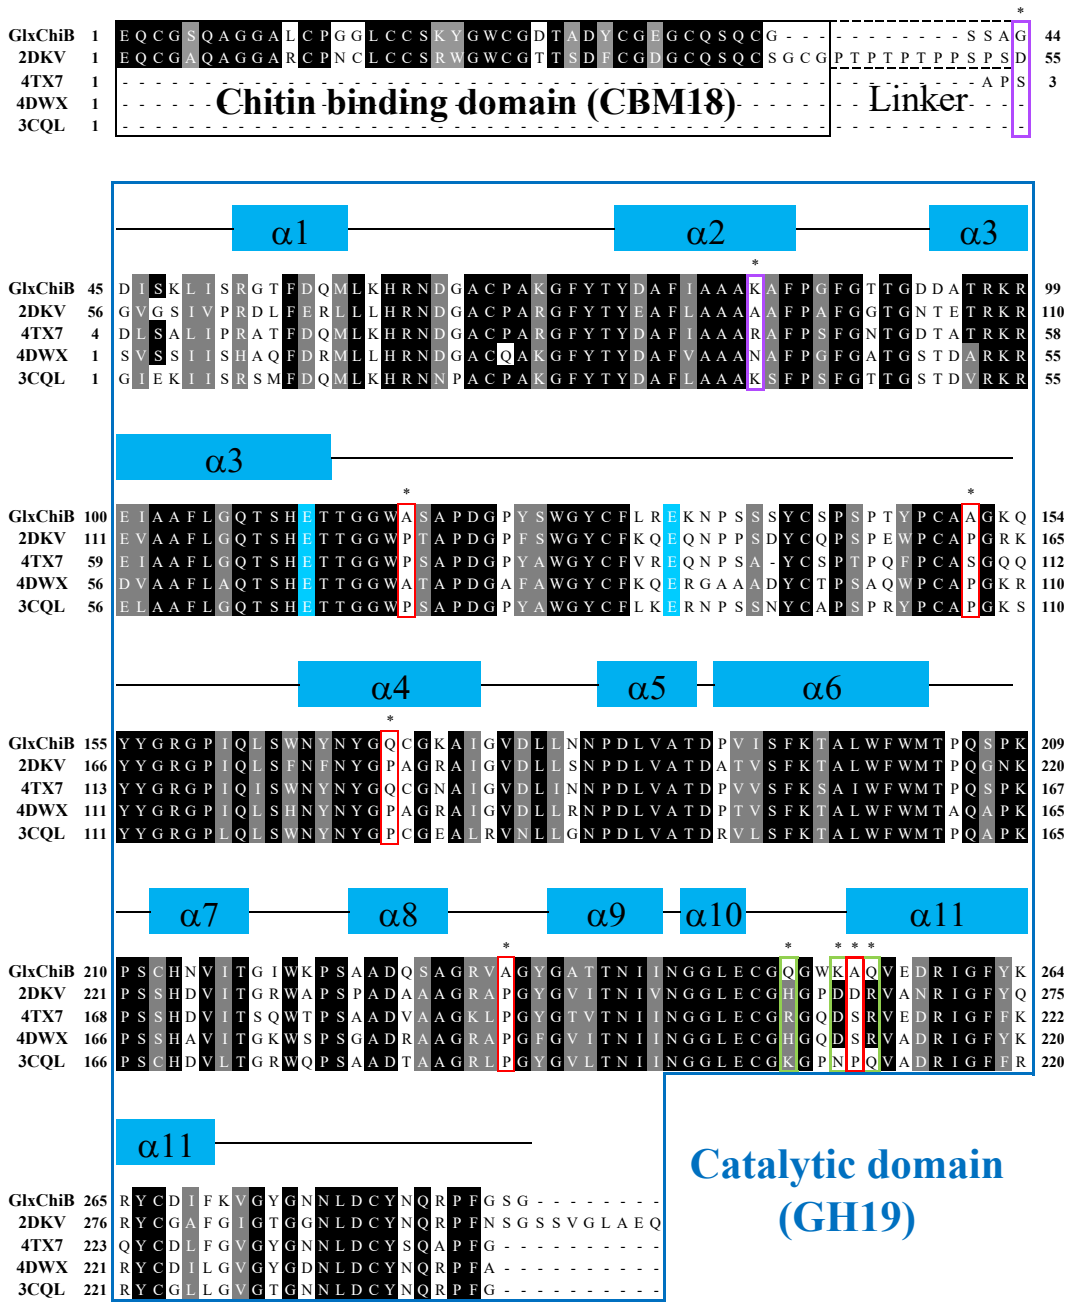

670 mutation sites, two cysteine mutation sites, and mutation sites for salt bridges are indicated  
671 with red boxes, purple boxes, and green boxes, respectively. All target sites are indicated  
672 with \*. The abbreviations of proteins are used for this alignment as PDB ID as follows:  
673 2DKV, class-I chitinase from *Oryza sativa*; 4TX7, catalytic domain of class I chitinase  
674 from *Vigna unguiculata*; 4DWX, class II chitinase from *Secale cereal* (rye) seed; 3CQL,  
675 class II chitinase from *Carica papaya* (Papaya).  
676

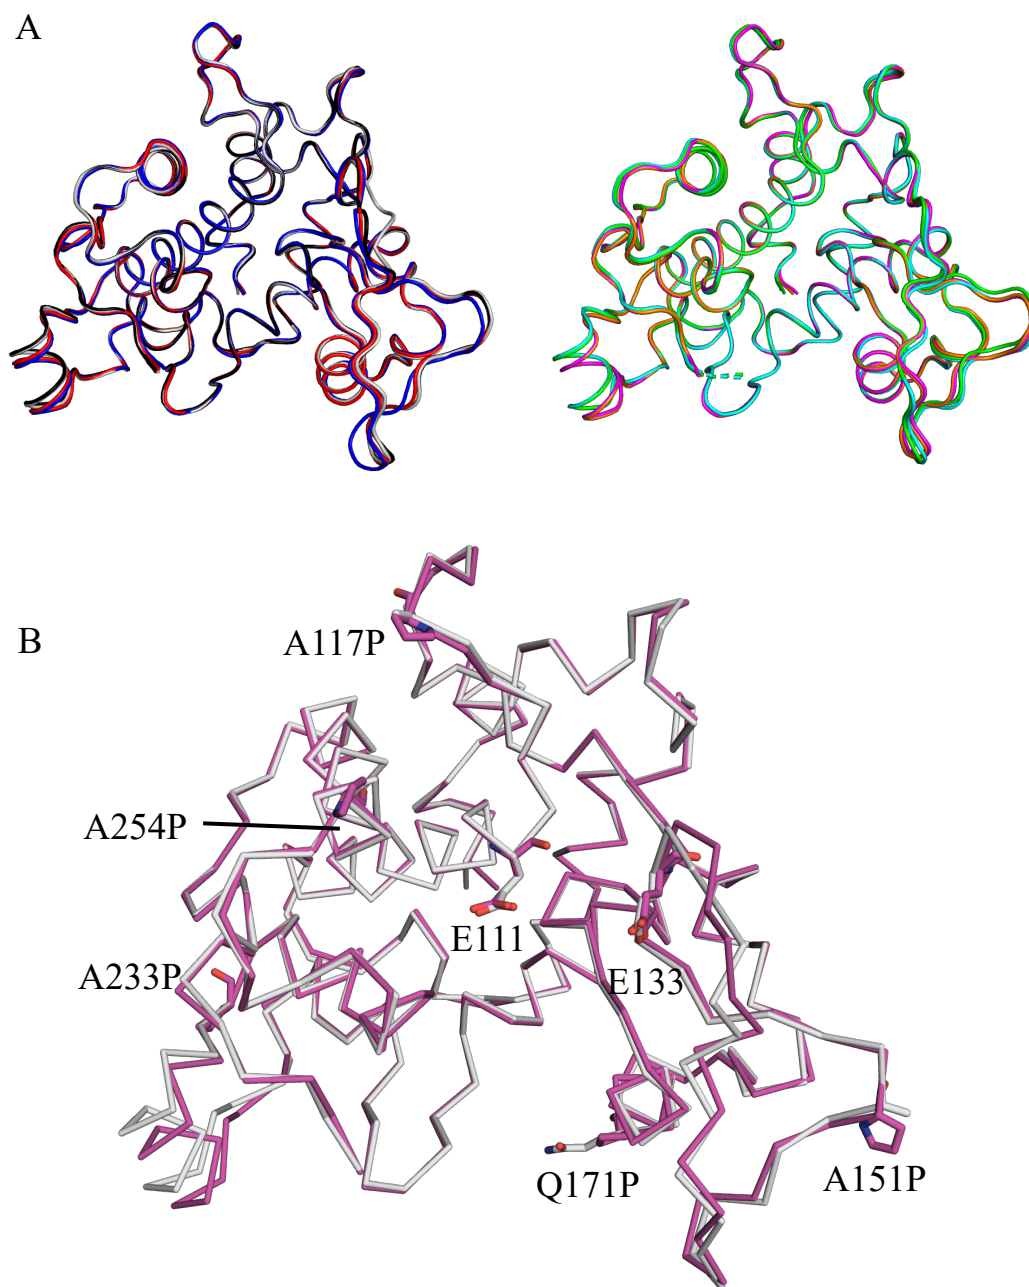

677

678 **Figure 2. Crystal structure of GlxChiB CD-WT and CD-mt5.**

679 (A) Superimposed models of four molecules of CD-WT (left) and CD-mt5 (right). Chains  
680 A-D of CD-WT and CD-mt5 are shown as cartoon loop models and colored gray, red, blue,  
681 black, magenta, cyan, orange, and green, respectively. (B) Structural alignment of CD-WT  
682 (gray) and CD-mt5 (magenta). C $\alpha$  of them are shown as ribbon models. Two catalytic

683 glutamate residues (E111 and E133) and proline substitution sites (A117P, A151P, A171P,  
684 A233P, and A254P) are shown in stick models with atomic elements colors (O atoms, red;  
685 N atoms, blue; C atoms, gray in CD-WT and magenta in CD-mt5, respectively).  
686

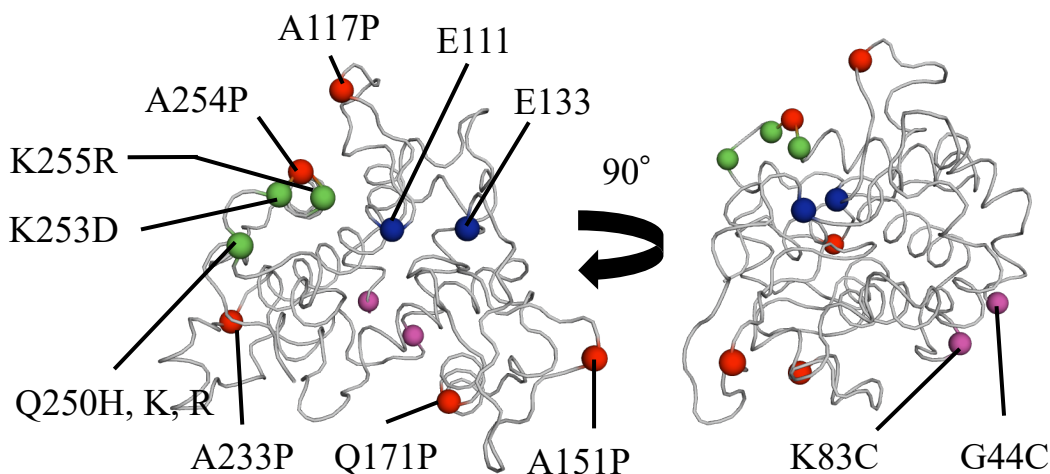

687  
688 **Figure 3. Positions of five proline substitutions and of introducing a disulfide bond**  
689 **and salt bridges.**

690 All five proline mutations (red sphere), two cysteine mutations (purple sphere), and three  
691 mutations for salt bridges (green sphere) are located apart from the active sites (blue  
692 sphere). Positions are labeled with the corresponding residue in WT-GlxChiB.  
693

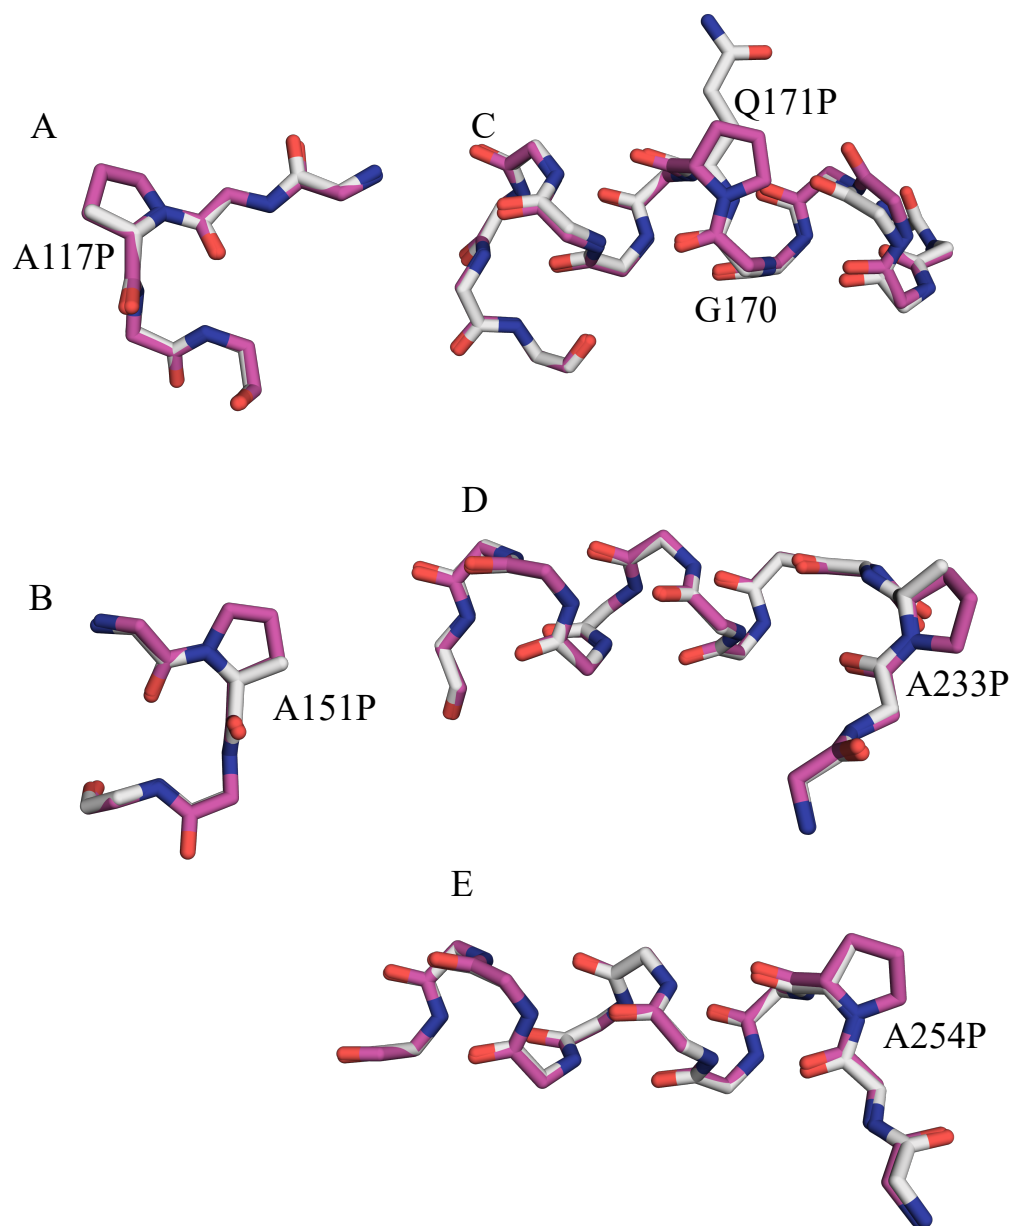

694

695 **Figure 4. Location of mutation sites from information of crystal structure.**

696 Main chains of target regions and side chains of mutation sites are shown as a stick model

697 with atomic elements colors (O atoms, red; N atoms, blue; C atoms, gray in CD-WT and

698 magenta in CD-mt5, respectively). A, Ala/Pro117 is located at second site of a beta-turn I.

699 B, Ala/Pro151 is located at second site of a beta-turn II. C, Gln/Pro171 is located in

700 conserved helix structure. D, Ala/Pro233 is located at the loop region preceding a

701 conserved helix structure. E, Ala /Pro254 is located at the loop region, preceding a  
702 conserved helix structure.  
703

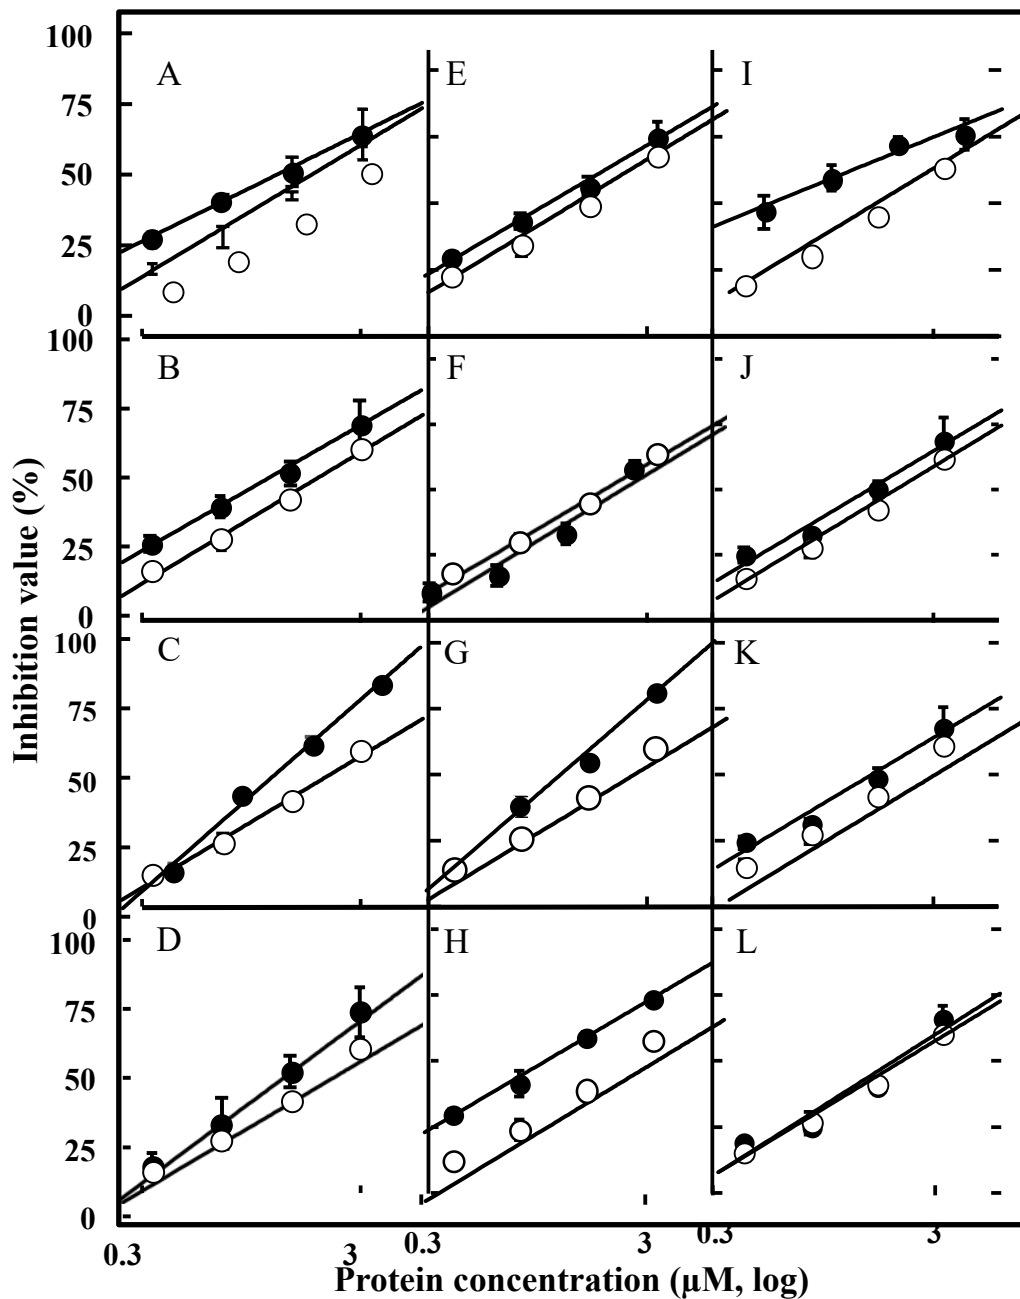

704

705 **Figure 5. Antifungal activities of thermostable mutants.**

706 Quantitative antifungal activity assays were performed as described in the methods. Five  
707 microliters of the sample were overlaid onto an agar disk containing the mycelium of *T.*  
708 *viride* on a PDA plate, and then, the plate was incubated at 25 °C for 12 hours. After  
709 incubation, the re-growth area of mycelia was measured. Open and closed circles indicate  
710 wild-type and mutants, respectively. (A-E) Proline substitution: A, A117P; B, A151P; C,  
711 Q171P; D, A233P; E, A254P. (F-H) Introducing disulfide bonding and salt bridges: F,  
712 G44C/K83C; G, Q250K/K253D/Q255R; H, Q250R/K253D/Q255R. (I-L) Integrated  
713 mutants: I, mt5; J, mt5ss; K, mt5ssKDR; L, mt5ssHDR. All assays were triplicate. Error  
714 bars represent  $\pm$  SD (n = 3).  
715

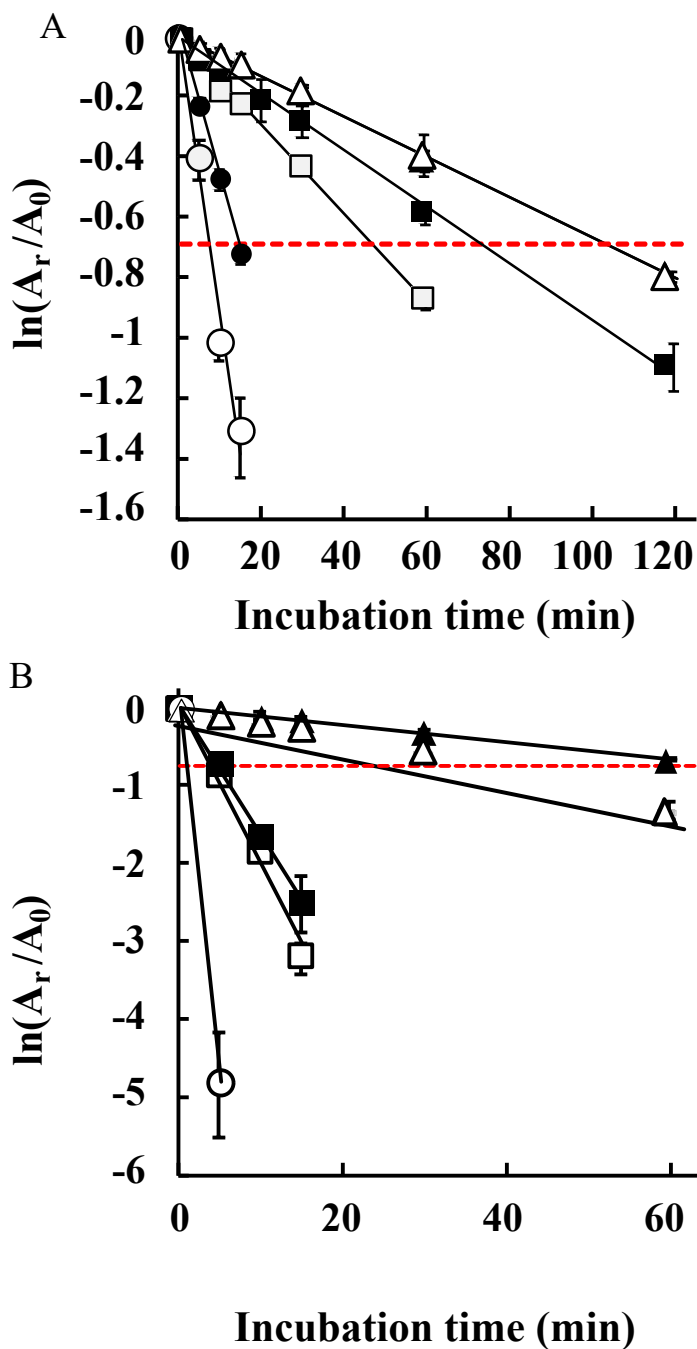

716

717 **Figure 6. Thermostability of GlxChiB WT and mutants.**

718 Enzyme samples in a 10 mM sodium phosphate buffer (pH 7.0) were incubated at 60 °C

719 (A) and 65 °C (B) for each period. After the treatment, the residual activities ( $A_r$ ) were



720 measured at 37 °C for 15 minutes in a 0.2 M sodium phosphate buffer (pH 7.0), with the  
721 initial activity without heat treatment taken as 100% ( $A_0$ ). Open circle, closed circle, open  
722 square, closed square, open triangle, and closed triangle indicate WT, G44C/K83C, mt5,  
723 mt5/G44C/K83C, mt5/G44C/K83C/KDR, and mt5/G44C/K83C/HDR, respectively. Red  
724 dashed lines indicate where the value of  $A_t/A_0 = 1/2$ : the residual activity is 50% of initial  
725 activity. All assays were triplicate. Error bars represent  $\pm$  SD ( $n = 3$ ).  
726

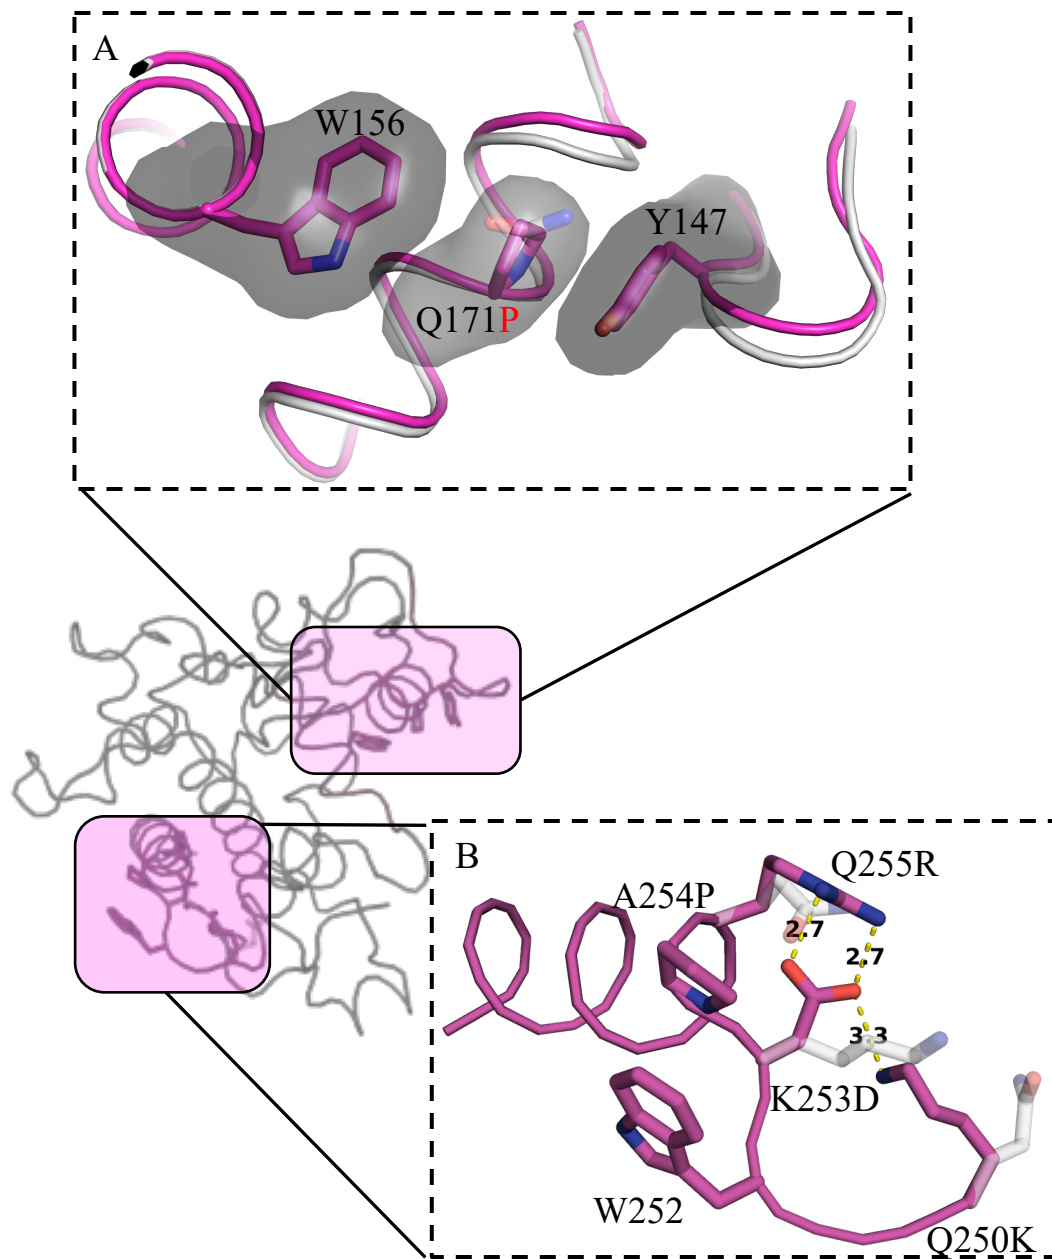

727

728 **Figure 7. New interactions in thermostable mutants and the estimated salt bridges.**

729 A, The hydrophobic interactions toward Pro171. The surface of Pro residue and two

730 aromatic residues, Y147 and W156 were shown in gray. B, Structure of loop region from

731 Q250 to Q255 in mt5. The salt bridge network among K250, D253, and R255 was

732 estimated using a PyMOL mutagenesis option based on the structure of mt5 (the orientation

733 of the side chains is adjusted to avoid steric hindrance). Side chains of original residues,

734 Q250, K253, and Q255 are shown as stick model colored transparent. The Estimated  
 735 hydrogen bonding among K250, D253, and R255 are indicated as yellow dashed lines with  
 736 labeled number as the distance (Å).

737

738 **Supplemental information**

739

740 **Table S1. Site-directed mutagenesis primers.**

| Primer name             |     | Template          | Mutation    | Sequence (5' to 3')                  |
|-------------------------|-----|-------------------|-------------|--------------------------------------|
| A117P                   | Fwd | WT                | A117P       | AAACTACCGGTGGATGGCCAAGTGCTCCTGATGGT  |
|                         | Rev | WT                | A117P       | ACCATCAGGAGCACTTGCCATCCACCGGTAGTTT   |
| A151P                   | Fwd | WT                | A151P       | TTATCCTGTGCCCTGGAAAGCAATATTATGGCCG   |
|                         | Rev | WT                | A151P       | CGGCCATAAATTGCTTTCCAGGGGCACAAGGATAA  |
| Q171P                   | Fwd | WT                | Q171P       | GAACTACAACACTACGGGCGGTGTGAAAAGCCATAG |
|                         | Rev | WT                | Q171P       | CTATGGCTTTTCCACACGGCCCGTAGTTGTAGTTC  |
| A233P                   | Fwd | WT                | A233P       | GCCGGTCGAGTACCAAGGATATGGTGC          |
|                         | Rev | WT                | A233P       | GCACCATATCCTGGTACTCGACCGGC           |
| A254P                   | Fwd | WT                | A254P       | CCAAGGTTGGAAGCCACAAGTGGAGGACC        |
|                         | Rev | WT                | A254P       | GGTCCTCCACTTGTGGCTTCCAACCTTGG        |
| G44C                    | Fwd | WT, mt5           | G44C        | AGCGCTTGGCAGCATCAGCAAATC             |
|                         | Rev | WT, mt5           | G44C        | GATGTCGCAAGCGCTACTGCCACATTG          |
| K83C                    | Fwd | WT, mt5           | K83C        | GCCGCCTGCGCCTTCCCTGGCTTTGGC          |
|                         | Rev | WT, mt5           | K83C        | GAAGGCGCAGGCGGCTGCGATGAAAAGC         |
| Q250K/K253D             | Fwd | WT                | Q250K/K253D | CAAAGGTTGGGACGCTCAGGTGGAGGACCG       |
|                         | Rev | WT                | Q250K/K253D | CGTCCCAACCTTTGCCACATTCAAGACCTC       |
| Q250K/K253D/Q255R       | Fwd | Q250K/K253D       | Q255R       | GACGCTCGGGTGGAGGACCGGATTGG           |
|                         | Rev | Q250K/K253D       | Q255R       | CTCCACCCGAGCGTCCCAACCTTTGC           |
| Q250R/K253D/Q255R       | Fwd | Q250K/K253D/Q255R | K250R       | CAAAGGTTGGGACGCTCGGGTGGAGGACCG       |
|                         | Rev | Q250K/K253D/Q255R | K250R       | CGTCCCAACCCCGGCCACATTCAAGACCTC       |
| mt5ss/K253D/Q255R       | Fwd | mt5ss             | K253D/Q255R | GTTGGGATCCACGGGTGGAGGACCGGATTG       |
|                         | Rev | mt5ss             | K253D/Q255R | CCGTGGATCCCAACCTTGGCCACATTCAAG       |
| mt5ss/Q250K/K253D/Q255R | Fwd | mt5ss/K253D/Q255R | Q250K       | AAGGTTGGGATCCACGGGTGGAGGACCGG        |
|                         | Rev | mt5ss/K253D/Q255R | Q250K       | ACCCGTGGATCCCAACCTTGGCCACATTC        |
| mt5ss/Q250H/K253D/Q255R | Fwd | mt5ss/K253D/Q255R | Q250H       | CATGGTTGGGATCCACGGGTGGAGGACCGG       |
|                         | Rev | mt5ss/K253D/Q255R | Q250H       | ACCCGTGGATCCCAACCATGGCCACATTC        |

741

742

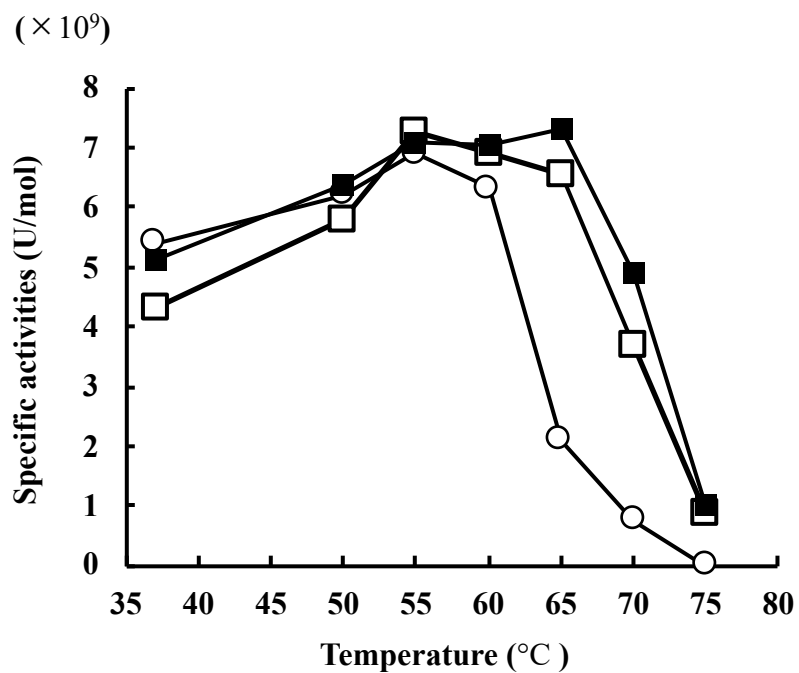

743

744 **Figure S1. Optimum temperature of WT and integrated mutants.**

745 Specific activities were determined using 0.2% (w/v) glycol chitin as substrate in 0.2 M

746 sodium phosphate buffer (pH 7.0) for 15 minutes. Open circles indicate WT. Open and

747 closed squares indicate mt5ssKDR and mt5ssHDR, respectively.

748

A

|                 |     |   |   |   |   |   |   |   |   |   |   |   |   |   |   |   |     |
|-----------------|-----|---|---|---|---|---|---|---|---|---|---|---|---|---|---|---|-----|
| GlxChiB mt5/KDR | 250 | K | G | W | D | P | R | V | E | D | R | I | G | F | Y | K | 264 |
| 4DWX            | 206 | H | G | Q | D | S | R | V | A | D | R | I | G | F | Y | K | 220 |
| 4TX7            | 208 | R | G | Q | D | S | R | V | E | D | R | I | G | F | F | K | 222 |

B

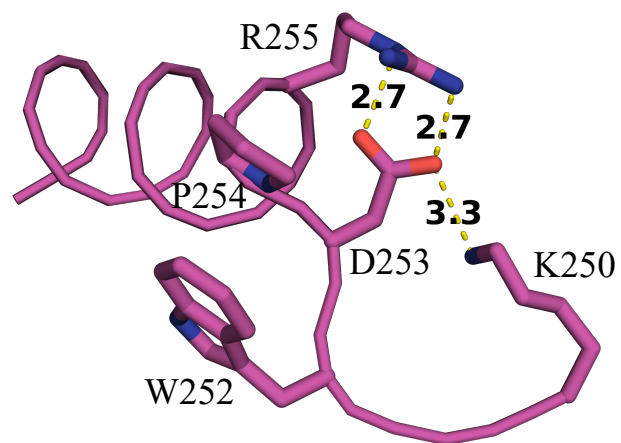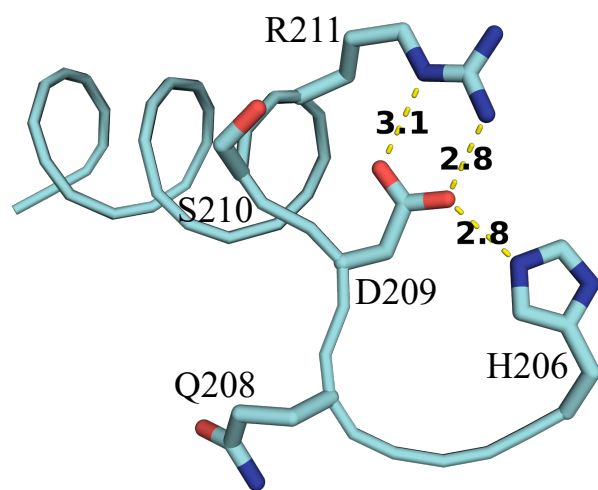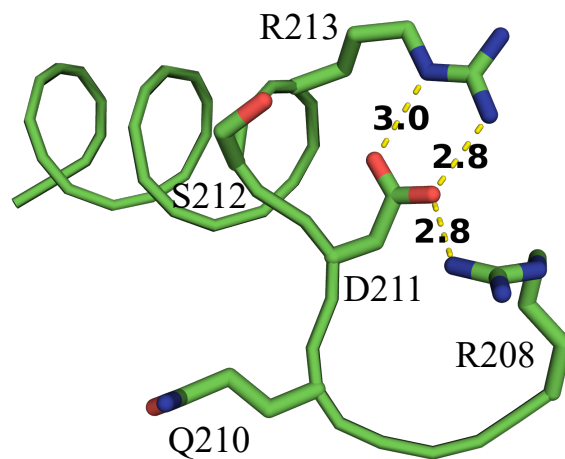

- 750 **Figure S2. comparison of salt bridge network in other GH19 chitinases.**
- 751 A, Multiple sequence alignment among GlxChiB mt5/KDR, 4DWX, and 4TX7.
- 752 B, Structural comparison of the salt bridge network among these three GH19 chitinases.
